# Supplementary material for: “Well” off in animals: A taphonomic history of faunal resources and refuse from a well feature at Petsas House, Mycenae (Greece)
Source: PLoS One. 2023 Mar 1;18(3):e0280517. doi: 10.1371/journal.pone.0280517 (PMC9977029; doi:10.1371/journal.pone.0280517)
Supplement: S8 File — (XLSX) [file pone.0280517.s008.xlsx]

## Sheet: S8_File
Chi-Square Tests of Complete and Not Complete Bones of Medium-sized Ungulate Specimens
	Value	df	Asymptotic Significance (2-sided)
Pearson Chi-Square	101.522a	18	1.16466e-13
Likelihood Ratio	108.465	18	6.07409e-15
N of Valid Cases	8889
Cramer's V	0.106869		1.16466e-13
	Adjusted Residual Values					NISP Counts
Level Group	Not Complete	Complete	Sig. Values		Level Group	Not Complete	Complete	Total
5	2.38864	n<5	*		5	68	1	69
10	0.0144559	n<5			10	36	4	40
15	1.94378	-1.94378			15	142	8	150
20	3.76138	-3.76138	**		20	235	7	242
25	2.18727	-2.18727	*		25	453	35	488
30	0.78161	-0.78161			30	696	71	767
35	4.43876	-4.43876	***		35	995	66	1061
40	-0.708684	0.708684			40	625	76	701
45	-4.02454	4.02454	***		45	398	73	471
50	1.94903	-1.94903			50	738	65	803
55	1.28715	-1.28715			55	585	55	640
60	-0.723373	0.723373			60	351	44	395
65	-2.65289	2.65289	*		65	465	72	537
70	-1.87706	1.87706			70	649	89	738
75	-1.86915	1.86915			75	433	62	495
80	-4.31396	4.31396	***		80	828	135	963
85	1.39551	-1.39551			85	204	16	220
90	-1.71429	1.71429			90	63	12	75
95	-0.329289	n<5			95	30	4	34
					Total	7994	895	8889
Legend
Significance	Symbol	Significance threshold given df
p <.05	*	≥2.1 & ≤ -2.1
p <.01	**	≥2.9 & ≤ -2.9
p <.001	***	≥3.9 & ≤ -3.9
Teeth excluded
